# Supplementary material for: Restoring physiological parameters of the pancreas and kidney through treatment with a polymeric nano-formulation of C-peptide and lisofylline combination in diabetic nephropathy
Source: Royal Society of Chemistry journal article supplement (doi:10.1039/d4nr02010c), 2024-01-01
Supplement: d4nr02010c1.pdf [file d4nr02010c1.pdf]

## SUPPLEMENTARY INFORMATION

### **Restoring physiological parameters of the pancreas and kidney through treatment with a polymeric nano-formulation of C-peptide and lisofylline combination in diabetic nephropathy**

Arihant Kumar Singh, Kommera Sai Pradyuth, Deepak Chitkara, Anupama Mittal\*

Department of Pharmacy, Birla Institute of Technology and Science (BITS PILANI),  
Pilani, Rajasthan, INDIA-333031

\*All correspondence relating to this paper should be addressed to:

#### **Corresponding author**

Dr. Anupama Mittal

Associate Professor,

Department of Pharmacy,

Birla Institute of Technology and Science (BITS) Pilani, Pilani Campus

Pilani, Rajasthan, INDIA-333 031

Email ID: [anupama.mittal@pilani.bits-pilani.ac.in](mailto:anupama.mittal@pilani.bits-pilani.ac.in)

ORCID ID: 0000-0003-3344-9579

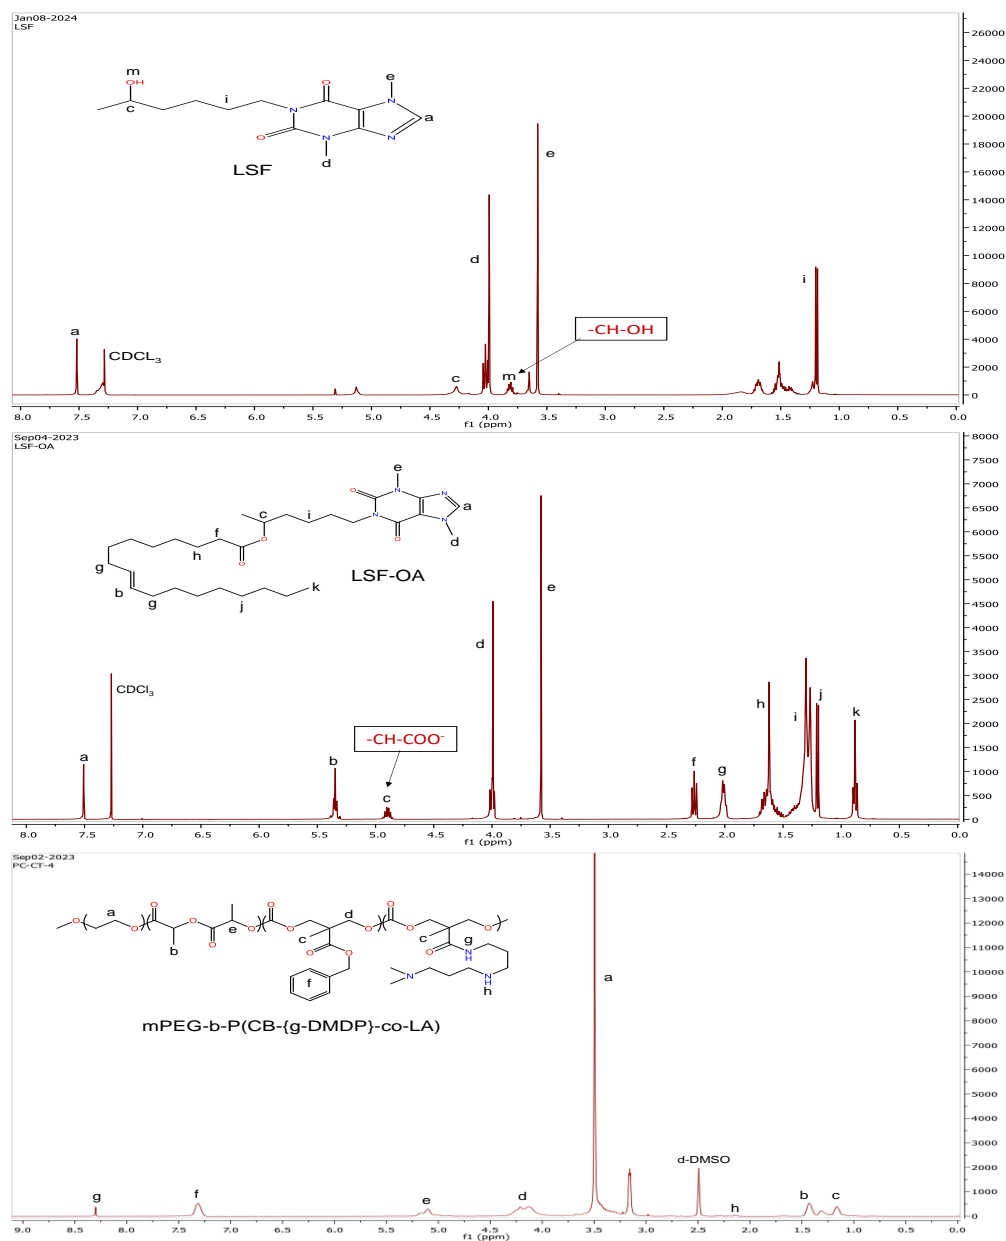

**Figure S1.** <sup>1</sup>H NMR spectra of *in-house* synthesized and purified A) LSF, B) LSF-OA prodrug and, C) cationic (mPEG-b-P(CB-{g-DMDP}-co-LA) polymer.
